# Supplementary material for: Trends in Outpatient Psychotherapy Provision by U.S. Psychiatrists: 1996–2016
Source: Atypon-hosted journal article supplement (doi:10.1176/appi.ajp.2021.21040338), 2021-12-08
Supplement: appi.ajp.2021.21040338.ds001.pdf [file appi.ajp.2021.21040338.ds001.pdf]

## Supplementary Online Content

### Trends in Outpatient Psychotherapy Provision by US Psychiatrists: 1996-2016

**Table S1.** ICD-9 CM and ICD-10 CM Diagnostic Codes.

**Table S2.** Generic Psychotropic Medication Names by Classes.

**Table S3.** Trends in Outpatient Psychiatrist Visits Involving Psychotherapy. Alternative Partitioning: Three 3-Year Spans.

**Table S4.** Trends in Outpatient Psychiatrist Visits Involving Psychotherapy Excluding Community Mental Health-Center Visits.

**Table S5.** Associations of Visit Characteristics with Psychotherapy Provision in Psychiatrist Visits 2010-2016.

**Table S6.** Caseload Composition of Psychiatrists Providing Psychotherapy in All, Some, or No Patient Visits.

**Table S7.** Associations of Visit Characteristics with Psychotherapy Provision in Psychiatrist Visits Controlling for Psychotherapy Provision in All, Some, or No Visits.

**Figure S1.** Percentage of Psychiatrist Visits Involving Psychotherapy 1996-2016 Excluding Community Mental-Health Centers.

**Figure S2.** Psychiatrists by Percentage of Visits Involving Psychotherapy During Three 3-Year Periods.

| <b>Table S1. ICD-9 CM and ICD-10 CM Diagnostic Codes</b> |                                        |                                     |
|----------------------------------------------------------|----------------------------------------|-------------------------------------|
|                                                          | <b>ICD-9 CM</b>                        | <b>ICD-10 CM</b>                    |
| Major depressive disorder                                | 296.2, 296.3                           | F32-F32.5, F32.9, F33-F33.42, F33.9 |
| Dysthymic disorder                                       | 300.4                                  | F34.1                               |
| Bipolar disorder                                         | 296.0-296.09, 296.4-296.8              | F31-F31.9                           |
| Other mood disorders                                     | 296.9, 311                             | F30, F34, F39                       |
| Generalized anxiety disorder                             | 300.02                                 | F41.1                               |
| Panic disorder                                           | 300.01, 300.21                         | F40.01, F41.0                       |
| Obsessive-compulsive disorder                            | 300.3                                  | F42                                 |
| Posttraumatic stress disorder                            | 309.81                                 | F43.1                               |
| Social phobia                                            | 300.23                                 | F40.1                               |
| Other anxiety disorders                                  | 300.00, 300.09, 300.20, 300.22, 300.29 | F40.2, F40.8, F41.8, F41.9          |
| Schizophrenia                                            | 295                                    | F20                                 |
| Personality disorders                                    | 301                                    | F60                                 |

**Table S2. Generic Psychotropic Medication Names by Classes**

| Antidepressants |                 | Antipsychotics   | Mood stabilizers  | Sedative-hypnotics |
|-----------------|-----------------|------------------|-------------------|--------------------|
| Amitriptyline   | Selegiline      | Aripiprazole     | Carbamazepine     | Alprazolam         |
| Amoxapine       | Sertraline      | Asenapine        | Divalproex sodium | Buspirone          |
| Bupropion       | Tranlycypromine | Chlorpromazine   | Lamotrigine       | Chloral hydrate    |
| Citalopram      | Trazodone       | Clozapine        | Lithium           | Chlordiazepoxide   |
| Clomipramine    | Trimipramine    | Fluphenazine     | Valproic acid     | Clonazepam         |
| Desipramine     | Venlafaxine     | Haloperidol      |                   | Clorazepate        |
| Desvenlafaxine  | Vilazodone      | Iloperidone      |                   | Diazepam           |
| Doxepin         | Vortioxetine    | Loxapine         |                   | Diphenhydramine    |
| Duloxetine      |                 | Lurasidone       |                   | Estazolam          |
| Escitalopram    |                 | Mesoridazine     |                   | Eszopiclone        |
| Fluoxetine      |                 | Molindone        |                   | Flurazepam         |
| Fluvoxamine     |                 | Olanzapine       |                   | Hydroxyzine        |
| Imipramine      |                 | Paliperidone     |                   | Lorazepam          |
| Isocarboxazid   |                 | Perphenazine     |                   | Meprobamate        |
| Levomilnacipran |                 | Pimozide         |                   | Oxazepam           |
| Maprotiline     |                 | Prochlorperazine |                   | Pentobarbital      |
| Milnacipran     |                 | Quetiapine       |                   | Phenobarbital      |
| Mirtazapine     |                 | Risperidone      |                   | Promethazine       |
| Nefazodone      |                 | Thioridazine     |                   | Quazepam           |
| Nortriptyline   |                 | Thiothixene      |                   | Suvorexant         |
| Paroxetine      |                 | Trifluoperazine  |                   | Temazepam          |
| Phenelzine      |                 | Ziprasidone      |                   | Triazolam          |
| Protriptyline   |                 |                  |                   | Zaleplon           |
| Rasagiline      |                 |                  |                   | Zolpidem           |



|                                      |      |      |      |      |      |      |      |     |      |     |      |     |
|--------------------------------------|------|------|------|------|------|------|------|-----|------|-----|------|-----|
| Prescribed                           | 54.5 | 3033 | 69.7 | 3604 | 76.1 | 5120 | 32.3 | 1.7 | 26.8 | 2.4 | 19.5 | 2.3 |
| Not prescribed                       | 11.9 | 721  | 7.9  | 534  | 11.9 | 962  | 62.1 | 1.4 | 63.3 | 6.3 | 45.1 | 6.2 |
| <b>Medication class</b>              |      |      |      |      |      |      |      |     |      |     |      |     |
| Antidepressants                      | 38.8 | 2215 | 49.5 | 2514 | 49.3 | 3278 | 35.8 | 1.9 | 27.2 | 2.7 | 19.5 | 2.2 |
| Antipsychotics                       | 12.5 | 645  | 22.3 | 1092 | 22   | 1502 | 25.2 | 1.6 | 17.9 | 2.7 | 16.7 | 2.5 |
| Mood stabilizers                     | 8    | 427  | 10.5 | 546  | 13.6 | 848  | 26.5 | 2.4 | 23.7 | 3.4 | 18.9 | 3.3 |
| Sedative-hypnotics                   | 19   | 1056 | 27.5 | 1339 | 27.7 | 1881 | 33.9 | 2.3 | 26.8 | 3.3 | 20.1 | 3.2 |
| <b>Source of payment<sup>d</sup></b> |      |      |      |      |      |      |      |     |      |     |      |     |
| Private insurance                    | 26.6 | 1535 | 38.1 | 1974 | 40.6 | 2706 | 33.6 | 2.4 | 30.5 | 3   | 21.3 | 3.2 |
| Medicare                             | 7.2  | 390  | 11.2 | 489  | 14   | 920  | 35.3 | 2.1 | 24.6 | 3.5 | 19   | 5.2 |
| Medicaid                             | 7.5  | 392  | 10.7 | 582  | 11.7 | 927  | 17   | 1.7 | 6.4  | 1.5 | 4.1  | 1.2 |
| Self-pay                             | 17.2 | 1038 | 12.3 | 773  | 20.3 | 1289 | 60   | 1.6 | 58.8 | 5.8 | 44.8 | 5   |
| Other                                | 4.7  | 257  | 3.6  | 211  | 3.6  | 260  | 23.6 | 3.1 | 31.4 | 7.4 | 13.1 | 4.4 |
| <b>Office setting<sup>d</sup></b>    |      |      |      |      |      |      |      |     |      |     |      |     |
| Freestanding, solo-practice          | 41.3 | 2373 | 44.3 | 2590 | 59.5 | 3592 | 48.3 | 2.5 | 45.8 | 3.9 | 31.3 | 3.7 |
| Freestanding, group-practice         | 15.2 | 804  | 21.7 | 934  | 14.4 | 1220 | 23.1 | 3.2 | 13.4 | 2.4 | 13.9 | 5.7 |
| HMO or other                         | 10   | 577  | 12.8 | 678  | 19.4 | 1514 | 15.4 | 1.6 | 7.6  | 3   | 5.9  | 1.5 |
| <b>Region</b>                        |      |      |      |      |      |      |      |     |      |     |      |     |
| Northeast                            | 21.1 | 1079 | 22.5 | 1411 | 26   | 1141 | 48.8 | 3.6 | 46.6 | 5.1 | 31.3 | 6   |
| Midwest                              | 12.8 | 632  | 11.1 | 630  | 15.2 | 1439 | 20.5 | 2.9 | 26.3 | 7.2 | 22.9 | 6.6 |
| South                                | 16.7 | 1030 | 28.5 | 1102 | 29.3 | 1946 | 32.2 | 2.3 | 16.2 | 3   | 7.8  | 2   |
| West                                 | 15.7 | 1013 | 16.7 | 1059 | 22.6 | 1800 | 42.4 | 2.8 | 36.7 | 5.8 | 34.6 | 6.2 |
| <b>Location</b>                      |      |      |      |      |      |      |      |     |      |     |      |     |
| Metropolitan                         | 58.2 | 3371 | 71.7 | 3872 | 90   | 5879 | 38.1 | 1.4 | 33.1 | 2.8 | 24.1 | 2.6 |
| Nonmetropolitan                      | 8.2  | 383  | 7.2  | 330  | 3.2  | 447  | 34.4 | 9.3 | 6.1  | 2.9 | 3.4  | 2   |

<sup>a</sup> Visits adjusted by survey weighting.

<sup>b</sup> Diagnosis numbers can be greater than visits since a visit can involve up to 3 diagnoses.

Data from the National Ambulatory Medical Care Survey (NAMCS) 1996-2016.



|                                      |       |      |       |      |       |      |      |     |      |     |      |     |      |            |         |
|--------------------------------------|-------|------|-------|------|-------|------|------|-----|------|-----|------|-----|------|------------|---------|
| Prescribed                           | 119   | 6951 | 162.5 | 8303 | 181.2 | 8831 | 31.3 | 1.3 | 25.2 | 1.6 | 20.4 | 1.8 | -0.8 | -1.2, -0.5 | < 0.001 |
| Not prescribed                       | 30    | 2103 | 20.5  | 1300 | 24.6  | 1379 | 63.5 | 1.3 | 54.4 | 4   | 50.5 | 4.8 | -0.9 | -1.5, -0.3 | 0.004   |
| <b>Medication class</b>              |       |      |       |      |       |      |      |     |      |     |      |     |      |            |         |
| Antidepressants                      | 86.1  | 5076 | 113.7 | 5821 | 117.8 | 5682 | 33.3 | 1.4 | 26.4 | 1.8 | 21.3 | 2   | -0.9 | -1.3, -0.6 | < 0.001 |
| Antipsychotics                       | 28.1  | 1549 | 51.3  | 2474 | 51.5  | 2721 | 23.4 | 1.7 | 16.8 | 1.6 | 15.9 | 1.7 | -0.5 | -0.9, -0.2 | 0.001   |
| Mood stabilizers                     | 17.7  | 1033 | 25.1  | 1273 | 30.6  | 1511 | 28.6 | 1.9 | 23.1 | 2.3 | 20.9 | 2.9 | -0.7 | -1.2, -0.2 | 0.007   |
| Sedative-hypnotics                   | 42.2  | 2442 | 60    | 2971 | 69.7  | 3355 | 32.3 | 1.5 | 26.2 | 2.1 | 20.6 | 2.3 | -0.9 | -1.3, -0.5 | < 0.001 |
| <b>Source of payment<sup>d</sup></b> |       |      |       |      |       |      |      |     |      |     |      |     |      |            |         |
| Private insurance                    | 58.9  | 3412 | 85.3  | 4387 | 93    | 4347 | 32.9 | 1.8 | 27.4 | 2.1 | 22.5 | 2.8 | -0.8 | -1.3, -0.3 | 0.004   |
| Medicare                             | 14.4  | 877  | 25.8  | 1153 | 29.7  | 1500 | 32.6 | 2.1 | 20.9 | 2.4 | 15.1 | 3.1 | -1.1 | -1.7, -0.6 | < 0.001 |
| Medicaid                             | 12.8  | 750  | 25.9  | 1320 | 26.1  | 1581 | 16.4 | 1.9 | 10   | 1.5 | 5.6  | 1   | -0.9 | -1.1, -0.7 | < 0.001 |
| Self-pay                             | 32.1  | 2025 | 32.7  | 1998 | 50.1  | 2284 | 58.9 | 2   | 53.2 | 4   | 45.3 | 3.6 | -1.2 | -1.7, -0.7 | < 0.001 |
| Other                                | 8.1   | 469  | 10.2  | 523  | 7     | 430  | 23.8 | 2.5 | 28.5 | 4.9 | 17.3 | 3.7 | -0.7 | -1.4, -0.1 | 0.03    |
| <b>Office setting<sup>d</sup></b>    |       |      |       |      |       |      |      |     |      |     |      |     |      |            |         |
| Freestanding, solo-practice          | 83.8  | 5008 | 108.3 | 5891 | 129.5 | 5963 | 46.8 | 1.6 | 39.4 | 2.6 | 33.5 | 3.1 | -1   | -1.5, -0.4 | 0.001   |
| Freestanding, group-practice         | 29.9  | 1672 | 50.4  | 2337 | 44.3  | 2099 | 19.7 | 3   | 14.5 | 2.1 | 14.8 | 3.3 | -0.6 | -1, -0.1   | 0.01    |
| HMO or other                         | 18.1  | 1150 | 26.1  | 1464 | 39.7  | 2462 | 17   | 3.3 | 11   | 2.2 | 5.1  | 1   | -0.9 | -1.2, -0.5 | < 0.001 |
| <b>Region</b>                        |       |      |       |      |       |      |      |     |      |     |      |     |      |            |         |
| Northeast                            | 44.1  | 2709 | 47.5  | 2809 | 66.5  | 2202 | 50.9 | 2.6 | 38.7 | 3.7 | 33.8 | 4.6 | -1.2 | -1.9, -0.5 | 0.001   |
| Midwest                              | 27.1  | 1721 | 31.3  | 1721 | 34.3  | 2480 | 28.9 | 2.7 | 26.1 | 4.1 | 15.2 | 3.5 | -1.1 | -1.8, -0.4 | 0.003   |
| South                                | 46.5  | 2569 | 68.7  | 2843 | 62.3  | 2977 | 27   | 1.8 | 18.5 | 2.2 | 10   | 1.9 | -1.4 | -1.7, -1   | < 0.001 |
| West                                 | 31.3  | 2055 | 37.2  | 2319 | 50.5  | 2865 | 42.9 | 2.8 | 36.3 | 4   | 35.9 | 5   | -0.5 | -1.3, 0.3  | 0.23    |
| <b>Location</b>                      |       |      |       |      |       |      |      |     |      |     |      |     |      |            |         |
| Metropolitan                         | 134.8 | 8237 | 165.8 | 8794 | 206.6 | 9865 | 38.9 | 1.3 | 30.6 | 1.8 | 24.8 | 2.1 | -1   | -1.4, -0.7 | < 0.001 |
| Nonmetropolitan                      | 14.1  | 817  | 19    | 898  | 6.9   | 659  | 26.8 | 6   | 10.9 | 3.8 | 12.1 | 5.3 | -1.8 | -3.1, -0.6 | 0.006   |

<sup>a</sup> Visits adjusted by survey weighting.

<sup>b</sup> Analysis based on weighted visit samples 1996-2016.

<sup>c</sup> Diagnosis numbers can be greater than visits since a visit can involve up to 3 diagnoses.

<sup>d</sup> Data missing for 1996.

Data from the National Ambulatory Medical Care Survey (NAMCS) 1996-2016.

**Table S5. Associations of Visit Characteristics with Psychotherapy Provision in Psychiatrist Visits 2010-2016<sup>a</sup>**

| Visit Characteristics         | Bivariate Logistic Regression |             |         | Multivariate Logistic Regression |            |         |
|-------------------------------|-------------------------------|-------------|---------|----------------------------------|------------|---------|
|                               | Risk Difference %             | 95% CI      | p Value | Adjusted Risk Difference %       | 95% CI     | p Value |
| Survey year                   | -0.9                          | -3.3, 1.4   | 0.44    | -2.1                             | -4.1, 0    | < 0.05  |
| <b>Age</b>                    |                               |             |         |                                  |            |         |
| <25                           | 0 [reference]                 | ...         | ...     | 0 [reference]                    | ...        | ...     |
| 25-44                         | 9.2                           | 4.3, 14.2   | < 0.001 | 5.3                              | 0.4, 10.3  | 0.04    |
| 45-64                         | 7.4                           | 2.5, 12.3   | 0.003   | 4.5                              | 0, 9       | 0.05    |
| 65≤                           | 12.5                          | 4.4, 20.7   | 0.003   | 8.9                              | 2, 15.8    | 0.01    |
| <b>Gender</b>                 |                               |             |         |                                  |            |         |
| Male                          | 0 [reference]                 | ...         | ...     | 0 [reference]                    | ...        | ...     |
| Female                        | 1                             | -2.3, 4.3   | 0.55    | 0.5                              | -2.4, 3.3  | 0.74    |
| <b>Race/ethnicity</b>         |                               |             |         |                                  |            |         |
| White                         | 0 [reference]                 | ...         | ...     | 0 [reference]                    | ...        | ...     |
| Black or African American     | -9.4                          | -14.6, -4.1 | < 0.001 | 2.4                              | -3.4, 8.1  | 0.42    |
| Hispanic or Latino            | -11.1                         | -16.5, -5.6 | < 0.001 | -5.4                             | -11.1, 0.3 | 0.06    |
| Other                         | 2.7                           | -9.3, 14.8  | 0.66    | 0.9                              | -8.4, 10.2 | 0.86    |
| <b>Psychiatric diagnosis</b>  |                               |             |         |                                  |            |         |
| Major depressive disorder     | -1.4                          | -6.4, 3.7   | 0.6     | 2                                | -5, 9      | 0.57    |
| Dysthymic disorder            | 11.2                          | 3.6, 18.7   | 0.004   | 6                                | -0.7, 12.8 | 0.08    |
| Bipolar disorder              | -7.4                          | -12.6, -2.2 | 0.005   | -1.5                             | -8, 5      | 0.65    |
| Other mood disorder           | 1.6                           | -4.4, 7.6   | 0.6     | 2.5                              | -3.8, 8.7  | 0.44    |
| Generalized anxiety disorder  | -0.7                          | -7.6, 6.1   | 0.83    | 2.4                              | -4.5, 9.2  | 0.5     |
| Panic disorder                | -9.4                          | -18.6, -0.2 | < 0.05  | -3.3                             | -10.5, 4   | 0.38    |
| Posttraumatic stress disorder | -0.1                          | -7.7, 7.6   | 0.98    | 4                                | -3, 11.1   | 0.26    |
| Social phobia                 | -6.2                          | -17.9, 5.5  | 0.3     | 0.5                              | -8.1, 9.2  | 0.91    |
| Other anxiety disorder        | 7.8                           | 1.8, 13.7   | 0.01    | 7.9                              | 1.1, 14.7  | 0.02    |
| Obsessive-compulsive disorder | 5                             | -1.4, 11.4  | 0.12    | 4.3                              | -1.7, 10.2 | 0.16    |
| Schizophrenia                 | -18.4                         | -26.7, -10  | < 0.001 | -3.4                             | -11, 4.3   | 0.39    |
| Personality disorders         | 17.4                          | 7.8, 27     | < 0.001 | 14.6                             | 7.1, 22.1  | < 0.001 |
| <b>Comorbidity</b>            |                               |             |         |                                  |            |         |
| No psychiatric comorbidities  | 0 [reference]                 | ...         | ...     | 0 [reference]                    | ...        | ...     |
| Psychiatric comorbidities     | 0.2                           | -4.7, 5.1   | 0.94    | -1.7                             | -7.6, 4.2  | 0.58    |
| <b>Medication<sup>b</sup></b> |                               |             |         |                                  |            |         |
| Prescribed                    | 0 [reference]                 | ...         | ...     | ...                              | ...        | ...     |
| Not prescribed                | 30                            | 21.4, 38.6  | < 0.001 | ...                              | ...        | ...     |



|                                      |               |              |         |               |              |         |
|--------------------------------------|---------------|--------------|---------|---------------|--------------|---------|
| <b>Medication class</b>              |               |              |         |               |              |         |
| Antidepressants                      | -6.6          | -11.2, -2    | 0.005   | -2.9          | -7.1, 1.3    | 0.17    |
| Antipsychotics                       | -12.4         | -17.3, -7.5  | < 0.001 | -2.4          | -5.6, 0.8    | 0.14    |
| Mood stabilizers                     | -4.3          | -10, 1.3     | 0.13    | 0             | -5, 4.9      | 0.99    |
| Sedative-hypnotics                   | -5.6          | -9.8, -1.4   | 0.009   | -3.3          | -6.5, -0.1   | 0.04    |
| <b>Source of payment<sup>c</sup></b> |               |              |         |               |              |         |
| Private insurance                    | 0 [reference] | ...          | ...     | 0 [reference] | ...          | ...     |
| Medicare                             | -7.5          | -13.9, -1    | 0.02    | -6.5          | -12.1, -0.8  | 0.02    |
| Medicaid                             | -16.9         | -22.5, -11.4 | < 0.001 | -11           | -16.8, -5.1  | < 0.001 |
| Self-pay                             | 22.7          | 14.1, 31.3   | < 0.001 | 15.4          | 7.6, 23.2    | < 0.001 |
| Other                                | -5.3          | -14, 3.4     | 0.23    | -0.4          | -8, 7.2      | 0.91    |
| <b>Office setting<sup>c</sup></b>    |               |              |         |               |              |         |
| Freestanding, solo-practice          | 0 [reference] | ...          | ...     | 0 [reference] | ...          | ...     |
| Freestanding, group-practice         | -18.8         | -28, -9.6    | < 0.001 | -10           | -20.8, 0.9   | 0.07    |
| HMO or other                         | -28.1         | -34.7, -21.6 | < 0.001 | -19.4         | -27.7, -11.2 | < 0.001 |
| <b>Region</b>                        |               |              |         |               |              |         |
| Northeast                            | 0 [reference] | ...          | ...     | 0 [reference] | ...          | ...     |
| Midwest                              | -18.6         | -30, -7.3    | 0.001   | -10           | -20.8, 0.9   | 0.07    |
| South                                | -23.7         | -33.5, -13.8 | < 0.001 | -19.4         | -27.7, -11.2 | < 0.001 |
| West                                 | 2.1           | -11.3, 15.5  | 0.76    | 4.6           | -6.6, 15.7   | 0.42    |
| <b>Location</b>                      |               |              |         |               |              |         |
| Metropolitan                         | 0 [reference] | ...          | ...     | 0 [reference] | ...          | ...     |
| Nonmetropolitan                      | -12.7         | -25.7, 0.3   | 0.06    | 3             | -9.5, 15.5   | 0.64    |

<sup>a</sup> Analysis based on weighted visit samples.

<sup>b</sup> Omitted from multivariate model due to multicollinearity with medication class. When omitting medication class covariates: Not prescribed Adjusted Risk Difference=17.4% (CI=10.1%,24.8%;  $p < 0.001$ ).

Data from the National Ambulatory Medical Care Survey (NAMCS) 2010-2016.

**Table S6. Caseload Composition of Psychiatrists Providing Psychotherapy in All, Some, or No Patient Visits<sup>a</sup>**

|                                          | No Psychotherapy Visits |            | Some Psychotherapy Visits |            | All Psychotherapy Visits |            | <i>p</i> Value |
|------------------------------------------|-------------------------|------------|---------------------------|------------|--------------------------|------------|----------------|
|                                          | Proportion %            | 95% CI     | Proportion %              | 95% CI     | Proportion %             | 95% CI     |                |
| <b>Psychiatric diagnosis<sup>b</sup></b> |                         |            |                           |            |                          |            |                |
| Major depressive disorder                | 27                      | 24.8, 29.2 | 27.8                      | 26.2, 29.4 | 21.4                     | 16.8, 26.1 | 0.04           |
| Dysthymic disorder                       | 4.4                     | 3.7, 5.2   | 8.8                       | 7.9, 9.6   | 13.9                     | 11.2, 16.6 | < 0.001        |
| Bipolar disorder                         | 16.6                    | 15.1, 18.1 | 14.4                      | 13.4, 15.4 | 7.8                      | 6, 9.5     | < 0.001        |
| Other mood disorder                      | 17.1                    | 15, 19.3   | 13.2                      | 12.1, 14.2 | 17.8                     | 13.7, 22   | 0.04           |
| Generalized anxiety disorder             | 7.3                     | 5.9, 8.7   | 7                         | 6, 8       | 9.1                      | 6.4, 11.9  | 0.23           |
| Panic disorder                           | 6                       | 5, 7       | 5.4                       | 4.8, 6     | 3.7                      | 2.2, 5.3   | 0.07           |
| Posttraumatic stress disorder            | 3                       | 2.5, 3.5   | 4.3                       | 3.9, 4.8   | 5.1                      | 3.6, 6.5   | 0.005          |
| Social phobia                            | 8.3                     | 7.2, 9.4   | 8.3                       | 7.4, 9.3   | 14.3                     | 10.2, 18.4 | 0.002          |
| Other anxiety disorder                   | 4.9                     | 4.1, 5.7   | 4.8                       | 4.1, 5.5   | 4.4                      | 2.9, 5.9   | 1              |
| Obsessive-compulsive disorder            | 0.8                     | 0.6, 1     | 1                         | 0.8, 1.2   | 1.2                      | 0.5, 2     | 0.44           |
| Schizophrenia                            | 8.1                     | 6.7, 9.4   | 5.9                       | 5.2, 6.6   | 2.1                      | 1.3, 3     | < 0.001        |
| Personality disorders                    | 2.5                     | 1.9, 3.1   | 6.1                       | 5.2, 6.9   | 8.1                      | 5.8, 10.3  | < 0.001        |
| <b>Comorbidity</b>                       |                         |            |                           |            |                          |            |                |
| Psychiatric comorbidities                | 19.5                    | 17.4, 21.5 | 20.6                      | 19.1, 22.1 | 20.8                     | 16.9, 24.7 | 1              |

<sup>a</sup> Analysis based on weighted visit samples.

<sup>b</sup> Aggregate proportions can be greater than 100% since a visit can involve up to 3 diagnoses.

Data from the National Ambulatory Medical Care Survey (NAMCS) 1996-2016.

**Table S7. Associations of Visit Characteristics with Psychotherapy Provision in Psychiatrist Visits Controlling for Psychotherapy Provision in All, Some, or No Visits<sup>a</sup>**

| Visit Characteristics                | Multivariate Logistic Regression |             |                |
|--------------------------------------|----------------------------------|-------------|----------------|
|                                      | Adjusted Risk Difference %       | 95% CI      | <i>p</i> Value |
| Survey year                          | -0.7                             | -1.1, -0.3  | 0.002          |
| <b>Age</b>                           |                                  |             |                |
| <25                                  | 0 [reference]                    | ...         | ...            |
| 25-44                                | 5                                | 1.2, 8.8    | 0.01           |
| 45-64                                | 6.1                              | 2.5, 9.6    | 0.001          |
| 65≤                                  | 5.9                              | 0.1, 11.8   | < 0.05         |
| <b>Gender</b>                        |                                  |             |                |
| Male                                 | 0 [reference]                    |             | ...            |
| Female                               | -1.7                             | -3.4, 0     | 0.06           |
| <b>Race/ethnicity</b>                |                                  |             |                |
| White                                | 0 [reference]                    | ...         | ...            |
| Black or African American            | -3.8                             | -7.5, 0     | < 0.05         |
| Hispanic or Latino                   | -9.5                             | -13.3, -5.7 | < 0.001        |
| Other                                | 1.4                              | -11.3, 14.1 | 0.83           |
| <b>Psychiatric diagnosis</b>         |                                  |             |                |
| Major depressive disorder            | -0.2                             | -4.4, 4     | 0.93           |
| Dysthymic disorder                   | 7.7                              | 3.7, 11.7   | < 0.001        |
| Bipolar disorder                     | 0.1                              | -4.7, 4.9   | 0.96           |
| Other mood disorder                  | 3.1                              | -1.1, 7.3   | 0.14           |
| Generalized anxiety disorder         | 1.2                              | -4.4, 6.9   | 0.67           |
| Panic disorder                       | -4.1                             | -9.1, 1     | 0.11           |
| Posttraumatic stress disorder        | 8                                | 1.6, 14.3   | 0.01           |
| Social phobia                        | 4.1                              | -2.7, 10.9  | 0.23           |
| Other anxiety disorder               | 4.7                              | -0.5, 9.9   | 0.08           |
| Obsessive-compulsive disorder        | 4.9                              | 0, 9.8      | 0.05           |
| Schizophrenia                        | -8.4                             | -14, -2.8   | 0.004          |
| Personality disorders                | 18.6                             | 13.1, 24.1  | < 0.001        |
| <b>Comorbidity</b>                   |                                  |             |                |
| No psychiatric comorbidities         | 0 [reference]                    | ...         | ...            |
| Psychiatric comorbidities            | -2.8                             | -7.1, 1.5   | 0.2            |
| <b>Medication class</b>              |                                  |             |                |
| Antidepressants                      | -5.5                             | -7.7, -3.3  | < 0.001        |
| Antipsychotics                       | -6.5                             | -9.2, -3.8  | < 0.001        |
| Mood stabilizers                     | -1.5                             | -4.6, 1.6   | 0.35           |
| Sedative-hypnotics                   | -4.3                             | -6.8, -1.8  | 0.001          |
| <b>Source of payment<sup>b</sup></b> |                                  |             |                |
| Private insurance                    | 0 [reference]                    | ...         | ...            |

|                                                                                                                                                                               |               |              |         |
|-------------------------------------------------------------------------------------------------------------------------------------------------------------------------------|---------------|--------------|---------|
| Medicare                                                                                                                                                                      | -4.1          | -8.1, -0.2   | 0.04    |
| Medicaid                                                                                                                                                                      | -13.6         | -17.1, -10.1 | < 0.001 |
| Self-pay                                                                                                                                                                      | 7.2           | 2.8, 11.5    | 0.001   |
| Other                                                                                                                                                                         | 0.1           | -5.9, 6.2    | 0.97    |
| <b>Office setting<sup>b</sup></b>                                                                                                                                             |               |              |         |
| Freestanding, solo-practice                                                                                                                                                   | 0 [reference] | ...          | ...     |
| Freestanding, group-practice                                                                                                                                                  | -20.5         | -25.7, -15.3 | < 0.001 |
| HMO or other                                                                                                                                                                  | -11.1         | -17.3, -4.9  | < 0.001 |
| <b>Region</b>                                                                                                                                                                 |               |              |         |
| Northeast                                                                                                                                                                     | 0 [reference] | ...          | ...     |
| Midwest                                                                                                                                                                       | -8.5          | -15.2, -1.7  | 0.01    |
| South                                                                                                                                                                         | -11.3         | -16, -6.6    | < 0.001 |
| West                                                                                                                                                                          | 1.3           | -4.6, 7.2    | 0.67    |
| <b>Location</b>                                                                                                                                                               |               |              |         |
| Metropolitan                                                                                                                                                                  | 0 [reference] | ...          | ...     |
| Nonmetropolitan                                                                                                                                                               | -10.8         | -18.2, -3.3  | 0.005   |
| <sup>a</sup> Analysis based on weighted visit samples.<br><sup>b</sup> Data missing for 1996.<br><br>Data from the National Ambulatory Medical Care Survey (NAMCS) 1996-2016. |               |              |         |

Figure S1. Percentage of psychiatrist visits involving psychotherapy 1996-2016 excluding community mental-health centers<sup>a</sup>

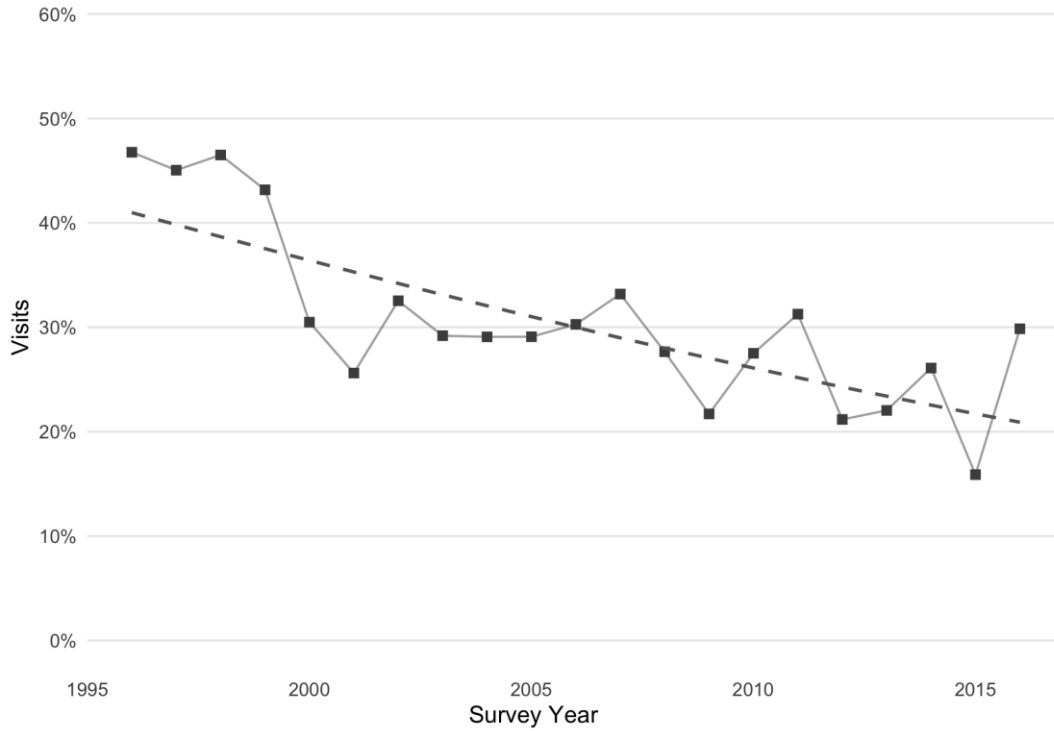

<sup>a</sup> When excluding community center visits (1.7% of all visits between 1997-2011), the decline in psychotherapy provision persists (Risk Difference=-1%; CI=-1.3%,-0.6%;  $p < 0.001$ ) and the 1996-1997 to 2015-2016 change in percentage of psychotherapy visits stands at 45.7% to 21.6%.

Figure S2. Psychiatrists by percentage of visits involving psychotherapy during three 3-year periods<sup>a</sup>

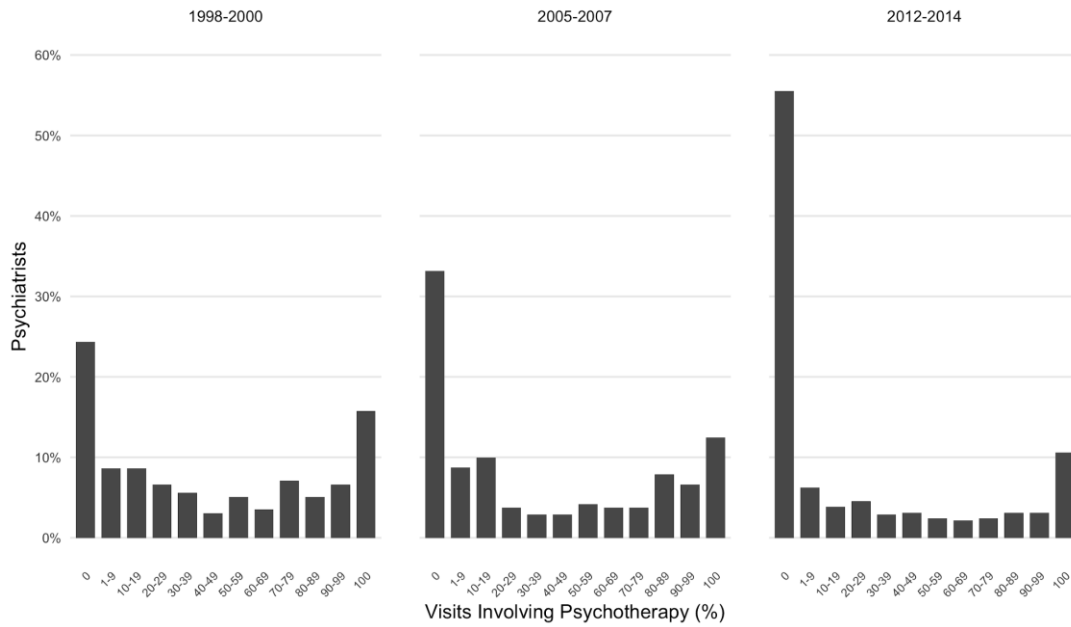

<sup>a</sup> Alternative partitioning demonstrates similar trends as the main analysis. Additionally, analyzing the proportion of psychiatrists providing no psychotherapy in any visits weighted at the physician-level (available from 2005) reveals similar trends as the non-weighted analysis. Whereas, of the 12 years of physician-weighted data available, the mean percentage of psychiatrists providing no psychotherapy in 2005-2010 was 34% (CI=29%,39%), in 2011-2016 this share had increased to 51% (CI=45%,56%).
